# Supplementary material
Source: PubMed Central journal article supplement (PMC3675235)
Supplement: mmc1.pdf [file mmc1.pdf]

The American Journal of Human Genetics, Volume 92

## **Supplemental Data**

### **Mutations in *POFUT1*, Encoding**

### **Protein O-fucosyltransferase 1, Cause**

### **Generalized Dowling-Degos Disease**

Ming Li, Ruhong Cheng, Jianying Liang, Heng Yan, Hui Zhang, Lijia Yang, Chengrang Li, Qingqing Jiao, Zhiyong Lu, Jianhui He, Jin Ji, Zhu Shen, Chunqi Li, Fei Hao, Hong Yu, and Zhirong Yao

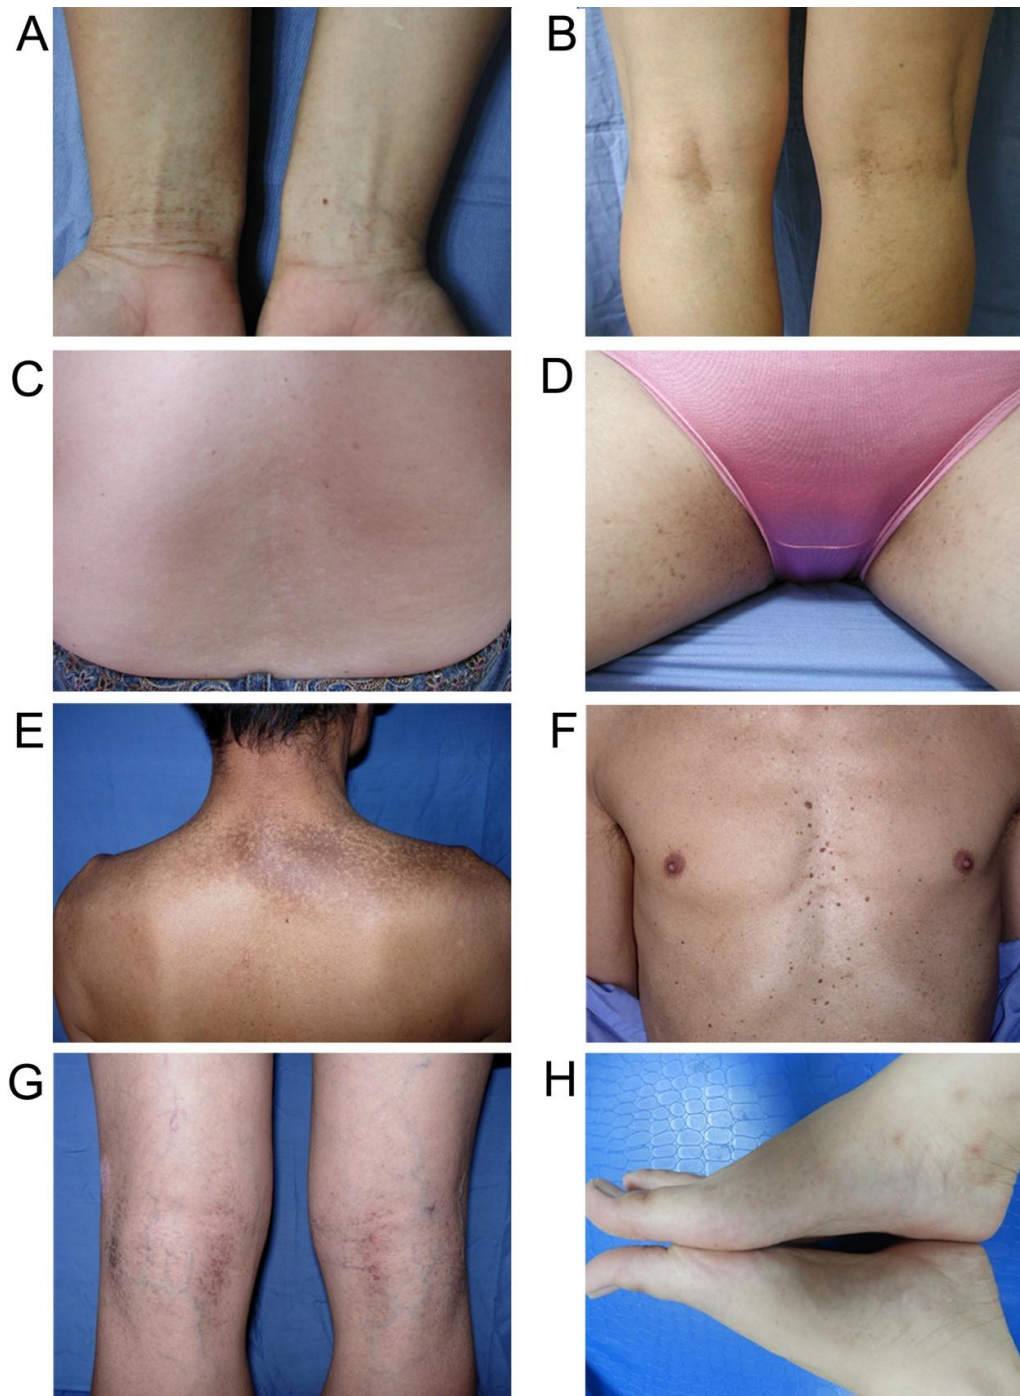

**Figure S1. Clinical Findings of Patients with Generalized DDD in Family 1**

(A–D) Clinical photographs of the patient (III:10). Reticulate on the wrists (A) and hyperpigmentation on the popliteal region (B), hyperpigmentation and hypopigmentation on the back (C) and spots of hyperpigmentation on the groin (D).

(E–G) Clinical photographs of the patient (III:4) in family 1. Reticulate hyperpigmentation and hypopigmentation on the neck and back (E), spots of hypopigmentation and hyperkeratotic dark brown papules on the chest and abdomen (F) and hyperpigmentation on the popliteal region (G).

(H) Spots of hyperpigmentation on the feet of the patient (IV:4).

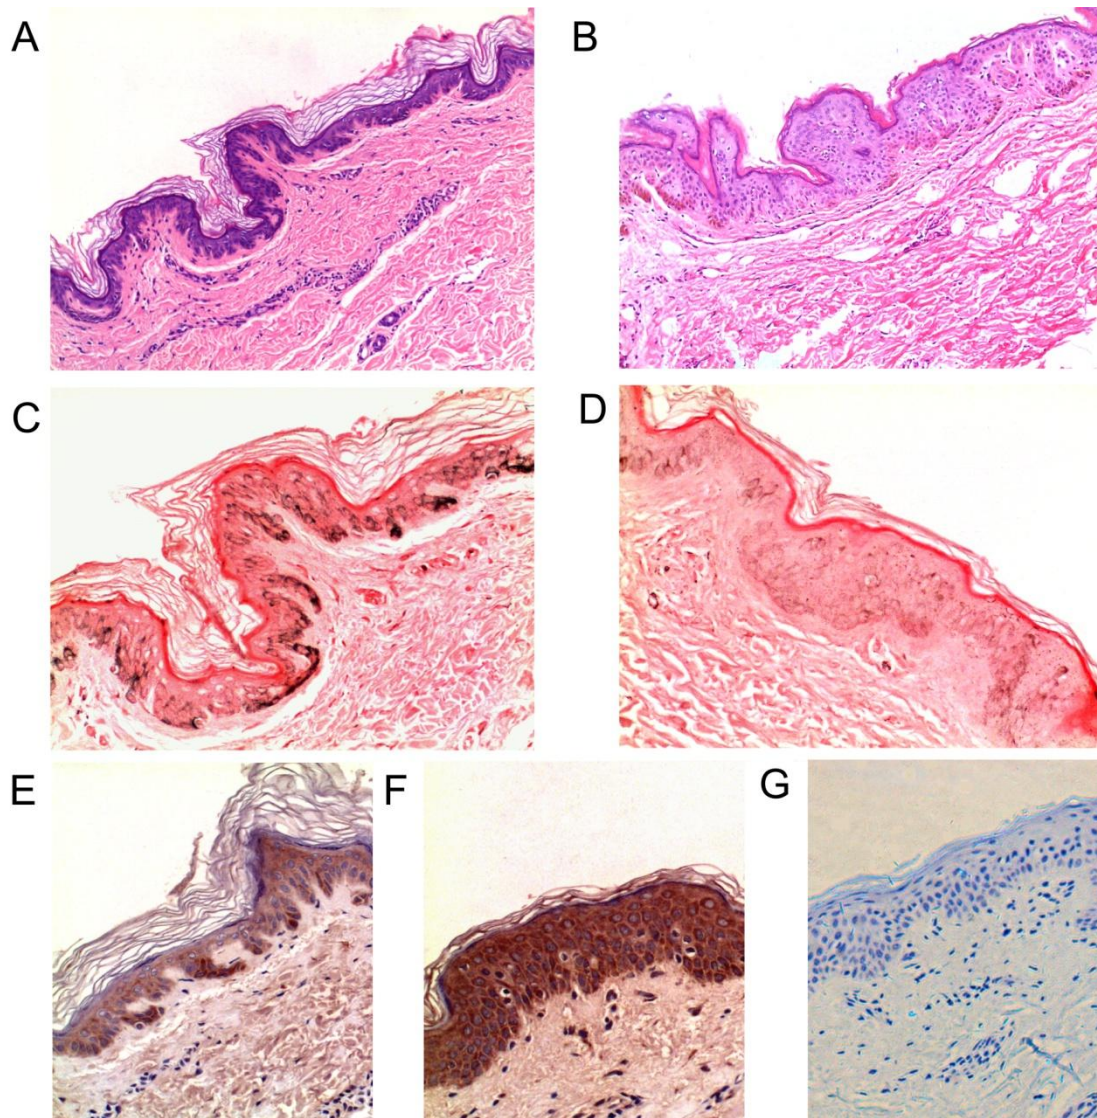

**Figure S2. Light Microscopy, Fontana-Masson Staining, and Immunohistochemistry of Sections from Individuals with DDD and Control Skin**

(A and B) Hematoxylin and eosin staining of sections from patient III:11 (100×) in family 1(A) and patient II:3 (200×) in family 2 (B) with DDD demonstrates papillary epidermal downgrowth with abnormal basal pigment granule distribution.

(C and D) Fontana-Masson staining (200×) shows uneven distribution of melanin in epidermis. A region of stratum basale was full of melanin particles, which were even distributed in the whole layers of epidermis(C). Another region of epidermis, however, rarely showed any positive staining (D).

(E–G) Immunohistochemical staining (200×) shows that the protein expression of POFUT1 was obviously decreased in patient (E) compared with that in control (F). Negative control (G).

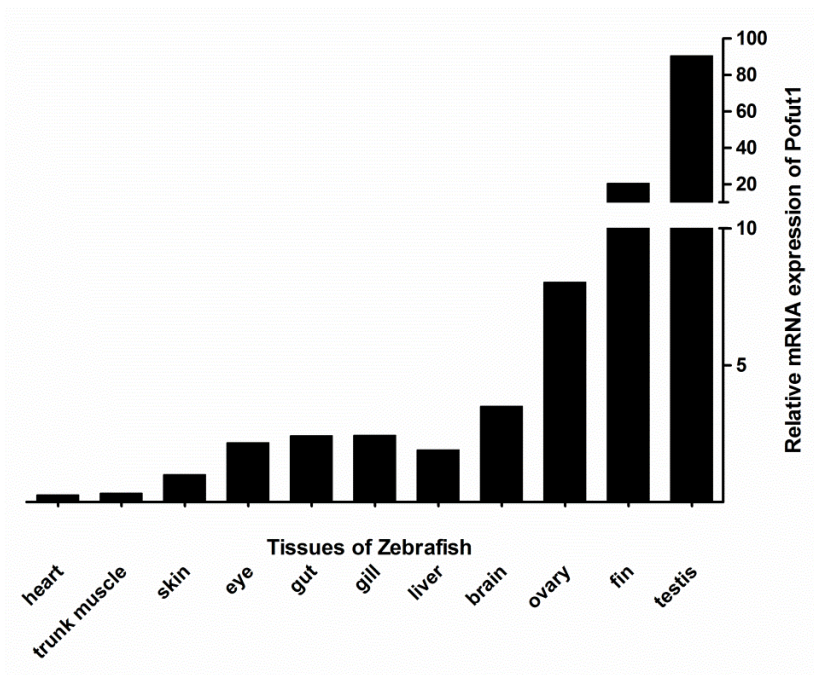

**Figure S3. RNA-Expression Level of *pofut1* Was Determined by Quantitative RT-PCR in Zebrafish**

*Pofut1* expression level was higher in the testis than in other tissues or organs in adult zebrafish.

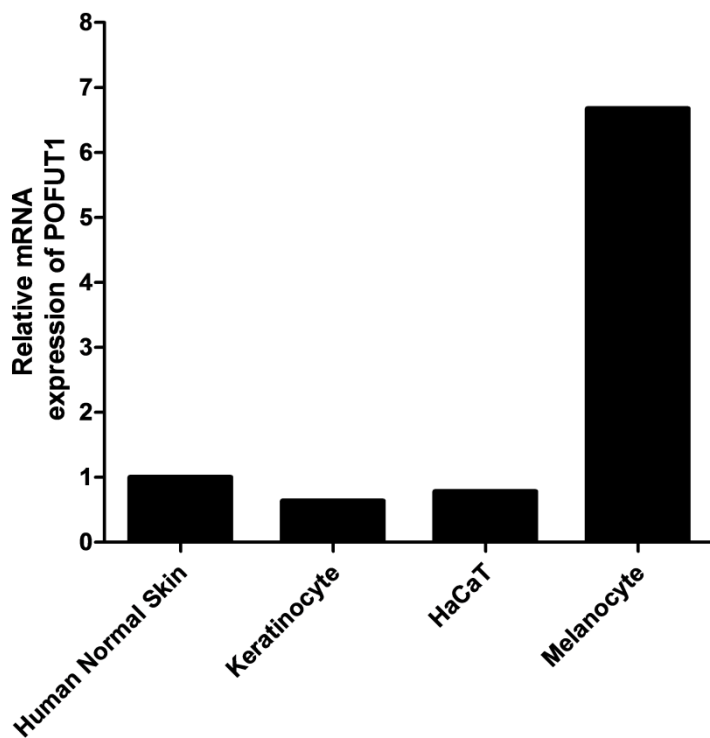

**Figure S4. RNA-Expression Level of *POFUT1* Was Determined by Quantitative RT-PCR in Human Cells**

*POFUT1* expression in melanocyte cell is much higher than in other cell lines and in normal skin.

**Table S1. PCR Primers for *POFUT1***

|               | Forward Primers (5'-3') | Reverse Primers (5'-3') | Annealing Temperature (°C) | Amplicon Size (bp) |
|---------------|-------------------------|-------------------------|----------------------------|--------------------|
| <b>Exon-1</b> | CTTCCCTCCCCGACTGTGC     | GCGCATCTGAGGAGTGGCTT    | <b>60.8</b>                | <b>247</b>         |
| <b>Exon-2</b> | CTTGGTATCCCTGACTTTCTAC  | GGACTTGAGGGTTAAGTGTAAG  | <b>55</b>                  | <b>307</b>         |
| <b>Exon-3</b> | ACGGGACCTCTGCTCCTCCTT   | TGCTTTTCCCCACATTTTGC    | <b>55</b>                  | <b>303</b>         |
| <b>Exon-4</b> | ATCCAGAATTGAAGCCACG     | CTAAACCCAGAAACGCTACC    | <b>53</b>                  | <b>342</b>         |
| <b>Exon-5</b> | CTGACTTCCCTCATTCATCTCC  | ACAGGCCAGGGCCATGCTC     | <b>60.8</b>                | <b>288</b>         |
| <b>Exon-6</b> | CACCTTACCAGGTCTTGCTTCT  | TTCTACTGCACTCCCCTT      | <b>53</b>                  | <b>348</b>         |
| <b>Exon-7</b> | AGCTCAGGGAATAAGGTTGG    | CTCCAGGATCAGAGGGTCTG    | <b>55</b>                  | <b>310</b>         |

**Table S2. Primer Pairs for qRT-PCR for Zebrafish**

|               | Forward Primers (5'-3')  | Reverse Primers (5'-3') | Amplicon Size(bp) |
|---------------|--------------------------|-------------------------|-------------------|
| <i>gapdh</i>  | ACCAACTGCCTGGCTCCTT      | CCATCCCTCCACAGCTTCC     | 137               |
| <i>pofut1</i> | AATGCTGAACCGAACTCTCG     | GTCCACTCCAATATGGTCCCAG  | 298               |
| <i>notch1</i> | CCTCGTGAACACCTACAAATGCT  | CACAACCGTAACCACCGACAC   | 161               |
| <i>notch2</i> | CCGTTGCCGTCTCGTTAT       | CACTGAGGGCGGCTCTTATC    | 240               |
| <i>hey1</i>   | GGAGGGACCGGATAAATAACAGT  | CCAGAGCGTGAGCATCAAAGT   | 174               |
| <i>mitf</i>   | TACAGTGATGACATTCTTGGGTTT | CAGGGCTCTGACTTCTGCTTCTA | 285               |
| <i>tyr</i>    | ACGACGGATACTTCATGGTGC    | CCGATGCGATTATTCCTGCTA   | 222               |
| <i>krt5</i>   | TCCGCACCCAGGAGAAAGA      | GTTGGATCGGGTAGTGGTCTGT  | 146               |

**Table S3. Primer Pairs for qRT-PCR for HaCaT Cells**

|                      | Forward Primers (5'-3') | Reverse Primers (5'-3') | Amplicon Size(bp) |
|----------------------|-------------------------|-------------------------|-------------------|
| <b><i>GAPDH</i></b>  | TGAAGGTCGGAGTCAACGGA    | CCTGGAAGATGGTGATGGGAT   | 255               |
| <b><i>POFUT1</i></b> | CTAAACCGTACCTTGGCTGTCC  | GCCTCTGGCTCCATTGTTCT    | 364               |
| <b><i>NOTCH1</i></b> | ACATCAACGAGTGTGCCAGTG   | GCAGTCAGGCGTGTGTTCT     | 128               |
| <b><i>NOTCH2</i></b> | GTGAATCCCTGACTCCAGAACG  | TCTCGGCGAAGAGTGAAACC    | 157               |
| <b><i>HES1</i></b>   | GAGGCGGCTAAGGTGTTTGG    | GCTGTTGCTGGTGTAGACGG    | 126               |
| <b><i>KRT5</i></b>   | AACCTGGACCTGGATAGCATCA  | ACATTGTCAATCTCGGCTCTCAG | 215               |

**Table S4. Result of Linkage Analysis on Chromosome 20**

| <b>Chr. No.</b> | <b>Physical Position (Mb)</b> | <b>Genetic Position (cM)</b> | <b>SNP</b> | <b>Analysis Model</b> | <b>HLOD</b> | <b>Alpha</b> |
|-----------------|-------------------------------|------------------------------|------------|-----------------------|-------------|--------------|
| 20              | 24230229                      | 54.04                        | rs1293713  | Dominant              | -2.7207     | 1            |
| 20              | 26257255                      | 54.85                        | rs2211139  | Dominant              | 2.5839      | 1            |
| 20              | 29310062                      | 55.23                        | rs1474945  | Dominant              | 2.7502      | 1            |
| 20              | 29428674                      | 55.25                        | rs709045   | Dominant              | 2.7572      | 1            |
| 20              | 30313908                      | 55.51                        | rs2377473  | Dominant              | 2.8389      | 1            |
| 20              | 31946046                      | 57.05                        | rs736264   | Dominant              | 3.1557      | 1            |
| 20              | 32624885                      | 57.1                         | rs764597   | Dominant              | 3.1636      | 1            |
| 20              | 33229276                      | 57.14                        | rs1415774  | Dominant              | 3.1712      | 1            |
| 20              | 34136337                      | 57.18                        | rs2746097  | Dominant              | 3.1774      | 1            |
| 20              | 34994883                      | 57.9                         | rs6130139  | Dominant              | 2.911       | 1            |
| 20              | 35106469                      | 57.98                        | rs3897903  | Dominant              | 2.8918      | 1            |
| 20              | 35379653                      | 58.19                        | rs7272911  | Dominant              | 2.8337      | 1            |
| 20              | 35933726                      | 59.47                        | rs717599   | Dominant              | 2.6841      | 1            |
| 20              | 38023441                      | 61.19                        | rs729429   | Dominant              | 2.5048      | 1            |
| 20              | 38219457                      | 61.27                        | rs1406966  | Dominant              | 2.4973      | 1            |
| 20              | 40018906                      | 63.74                        | rs6029893  | Dominant              | 2.2189      | 1            |
| 20              | 41555865                      | 66.55                        | rs765147   | Dominant              | 1.5592      | 1            |
| 20              | 42622691                      | 68.83                        | rs244123   | Dominant              | -3.0951     | 1            |
| 20              | 42846611                      | 69.33                        | rs1080026  | Dominant              | -6.724      | 1            |
